# Supplementary material for: Paired rRNA-depleted and polyA-selected RNA sequencing data and supporting multi-omics data from human T cells
Source: PubMed Central journal article supplement (PMC7652884; doi:10.1038/s41597-020-00719-4), 2020-11-09
Supplement: 41597_2020_719_MOESM1_ESM.pdf [file 41597_2020_719_MOESM1_ESM.pdf]

| EGA ID          | SAMPLE ID     | DONOR_ID | DONOR_SEX | DONOR_AGE | LIBRARY PROTOCOL |
|-----------------|---------------|----------|-----------|-----------|------------------|
| EGAR00001193011 | S00382B4_mRNA | S00382   | Male      | 60 - 65   | polyA-selected   |
| EGAR00001193012 | S00382B4_RNA  | S00382   | Male      | 60 - 65   | rRNA-depleted    |
| EGAR00001193013 | S00294B5_mRNA | S00294   | Male      | 50 - 55   | polyA-selected   |
| EGAR00001193014 | S00294B5_RNA  | S00294   | Male      | 50 - 55   | rRNA-depleted    |
| EGAR00001193015 | S007PQB3_mRNA | S007PQ   | Male      | 60 - 65   | polyA-selected   |
| EGAR00001193016 | S007PQB3_RNA  | S007PQ   | Male      | 60 - 65   | rRNA-depleted    |
| EGAR00001193017 | S003Q3B1_mRNA | S003Q3   | Female    | 50 - 55   | polyA-selected   |
| EGAR00001193018 | S003Q3B1_RNA  | S003Q3   | Female    | 50 - 55   | rRNA-depleted    |
| EGAR00001193019 | S001C2B5_mRNA | S001C2   | Male      | 65 - 70   | polyA-selected   |
| EGAR00001193020 | S001C2B5_RNA  | S001C2   | Male      | 65 - 70   | rRNA-depleted    |
| EGAR00001193021 | S001KN_mRNA   | S001KN   | Male      | 40 - 45   | polyA-selected   |
| EGAR00001193022 | S001KN_RNA    | S001KN   | Male      | 40 - 45   | rRNA-depleted    |
| EGAR00001193023 | S003JHB1_mRNA | S003JH   | Female    | 65 - 70   | polyA-selected   |
| EGAR00001193024 | S003JHB1_RNA  | S003JH   | Female    | 65 - 70   | rRNA-depleted    |
| EGAR00001193025 | S005N1B4_mRNA | S005N1   | Male      | 55 - 60   | polyA-selected   |
| EGAR00001193026 | S005N1B4_RNA  | S005N1   | Male      | 55 - 60   | rRNA-depleted    |
| EGAR00001193027 | S0031GB6_mRNA | S0031G   | Male      | 65 - 70   | polyA-selected   |
| EGAR00001193028 | S0031GB6_RNA  | S0031G   | Male      | 65 - 70   | rRNA-depleted    |
| EGAR00001193029 | S005VMB7_mRNA | S005VM   | Male      | 55 - 60   | polyA-selected   |
| EGAR00001193030 | S005VMB7_RNA  | S005VM   | Male      | 55 - 60   | rRNA-depleted    |
| EGAR00001193031 | S007F9_mRNA   | S007F9   | Female    | 65 - 70   | polyA-selected   |
| EGAR00001193032 | S007F9_RNA    | S007F9   | Female    | 65 - 70   | rRNA-depleted    |
| EGAR00001193033 | S002MFB3_mRNA | S002MF   | Male      | 65 - 70   | polyA-selected   |
| EGAR00001193034 | S002MFB3_RNA  | S002MF   | Male      | 65 - 70   | rRNA-depleted    |
| EGAR00001193035 | S002FTB4_mRNA | S002FT   | Male      | 60 - 65   | polyA-selected   |
| EGAR00001193036 | S002FTB4_RNA  | S002FT   | Male      | 60 - 65   | rRNA-depleted    |
| EGAR00001193037 | S004M7_mRNA   | S004M7   | Female    | 60 - 65   | polyA-selected   |
| EGAR00001193038 | S004M7_RNA    | S004M7   | Female    | 60 - 65   | rRNA-depleted    |
| EGAR00001193039 | S000GZB3_mRNA | S000GZ   | Male      | 50 - 55   | polyA-selected   |
| EGAR00001193040 | S000GZB3_RNA  | S000GZ   | Male      | 50 - 55   | rRNA-depleted    |
| EGAR00001193041 | S007CF_mRNA   | S007CF   | Female    | 60 - 65   | polyA-selected   |
| EGAR00001193042 | S007CF_RNA    | S007CF   | Female    | 60 - 65   | rRNA-depleted    |
| EGAR00001193043 | S001GV_mRNA   | S001GV   | Female    | 60 - 65   | polyA-selected   |
| EGAR00001193044 | S001GV_RNA    | S001GV   | Female    | 60 - 65   | rRNA-depleted    |
| EGAR00001193045 | S004N5B1_mRNA | S004N5   | Male      | 55 - 60   | polyA-selected   |
| EGAR00001193046 | S004N5B1_RNA  | S004N5   | Male      | 55 - 60   | rRNA-depleted    |
| EGAR00001193047 | S0064Z_mRNA   | S0064Z   | Male      | 50 - 55   | polyA-selected   |
| EGAR00001193048 | S0064Z_RNA    | S0064Z   | Male      | 50 - 55   | rRNA-depleted    |
| EGAR00001193049 | S002WW_mRNA   | S002WW   | Male      | 45 - 50   | polyA-selected   |
| EGAR00001193050 | S002WW_RNA    | S002WW   | Male      | 45 - 50   | rRNA-depleted    |
| EGAR00001193051 | S003R1B4_mRNA | S003R1   | Female    | 45 - 50   | polyA-selected   |
| EGAR00001193052 | S003R1B4_RNA  | S003R1   | Female    | 45 - 50   | rRNA-depleted    |
| EGAR00001193053 | S007DD_mRNA   | S007DD   | Female    | 50 - 55   | polyA-selected   |
| EGAR00001193054 | S007DD_RNA    | S007DD   | Female    | 50 - 55   | rRNA-depleted    |
| EGAR00001193055 | S001NH_mRNA   | S001NH   | Male      | 55 - 60   | polyA-selected   |
| EGAR00001193056 | S001NH_RNA    | S001NH   | Male      | 55 - 60   | rRNA-depleted    |
| EGAR00001193057 | S007VEB1_mRNA | S007VE   | Male      | 30 - 35   | polyA-selected   |
| EGAR00001193058 | S007VEB1_RNA  | S007VE   | Male      | 30 - 35   | rRNA-depleted    |
| EGAR00001193059 | S00630B7_mRNA | S00630   | Male      | 40 - 45   | polyA-selected   |
| EGAR00001193060 | S00630B7_RNA  | S00630   | Male      | 40 - 45   | rRNA-depleted    |
| EGAR00001193061 | S002XU_mRNA   | S002XU   | Male      | 45 - 50   | polyA-selected   |

|                 |               |        |        |         |                |
|-----------------|---------------|--------|--------|---------|----------------|
| EGAR00001193062 | S002XU_RNA    | S002XU | Male   | 45 - 50 | rRNA-depleted  |
| EGAR00001193063 | S0032EB5_mRNA | S0032E | Male   | 60 - 65 | polyA-selected |
| EGAR00001193064 | S0032EB5_RNA  | S0032E | Male   | 60 - 65 | rRNA-depleted  |
| EGAR00001193065 | S005WK_mRNA   | S005WK | Male   | 65 - 70 | polyA-selected |
| EGAR00001193066 | S005WK_RNA    | S005WK | Male   | 65 - 70 | rRNA-depleted  |
| EGAR00001193067 | S0012MB1_mRNA | S0012M | Female | 35 - 40 | polyA-selected |
| EGAR00001193068 | S0012MB1_RNA  | S0012M | Female | 35 - 40 | rRNA-depleted  |
| EGAR00001193069 | S003P5B1_mRNA | S003P5 | Male   | 45 - 50 | polyA-selected |
| EGAR00001193070 | S003P5B1_RNA  | S003P5 | Male   | 45 - 50 | rRNA-depleted  |
| EGAR00001193071 | S002EV_mRNA   | S002EV | Male   | 45 - 50 | polyA-selected |
| EGAR00001193072 | S002EV_RNA    | S002EV | Male   | 45 - 50 | rRNA-depleted  |
| EGAR00001193073 | S001T5_mRNA   | S001T5 | Male   | 50 - 55 | polyA-selected |
| EGAR00001193074 | S001T5_RNA    | S001T5 | Male   | 50 - 55 | rRNA-depleted  |
| EGAR00001193075 | S0041C_mRNA   | S0041C | Female | 60 - 65 | polyA-selected |
| EGAR00001193076 | S0041C_RNA    | S0041C | Female | 60 - 65 | rRNA-depleted  |
| EGAR00001193077 | S007G7_mRNA   | S007G7 | Male   | 60 - 65 | polyA-selected |
| EGAR00001193078 | S007G7_RNA    | S007G7 | Male   | 60 - 65 | rRNA-depleted  |
| EGAR00001193079 | S0026AB3_mRNA | S0026A | Female | 55 - 60 | polyA-selected |
| EGAR00001193080 | S0026AB3_RNA  | S0026A | Female | 55 - 60 | rRNA-depleted  |
| EGAR00001193081 | S0021KB5_mRNA | S0021K | Male   | 35 - 40 | polyA-selected |
| EGAR00001193082 | S0021KB5_RNA  | S0021K | Male   | 35 - 40 | rRNA-depleted  |
| EGAR00001193083 | S003AZ_mRNA   | S003AZ | Male   | 65 - 70 | polyA-selected |
| EGAR00001193084 | S003AZ_RNA    | S003AZ | Male   | 65 - 70 | rRNA-depleted  |
| EGAR00001193085 | S006XE_mRNA   | S006XE | Male   | 65 - 70 | polyA-selected |
| EGAR00001193086 | S006XE_RNA    | S006XE | Male   | 65 - 70 | rRNA-depleted  |
| EGAR00001193087 | S0010Q_mRNA   | S0010Q | Female | 60 - 65 | polyA-selected |
| EGAR00001193088 | S0010Q_RNA    | S0010Q | Female | 60 - 65 | rRNA-depleted  |
| EGAR00001193089 | S000X1_mRNA   | S000X1 | Female | 50 - 55 | polyA-selected |
| EGAR00001193090 | S000X1_RNA    | S000X1 | Female | 50 - 55 | rRNA-depleted  |
